# Supplementary material
Source: publisher figshare collection journal article supplement (https://plos.figshare.com/articles/dataset/_/6937817)
Supplement: Supplementary file [file 1]

| Plasmid                            | Created from plasmid | Source     |
|------------------------------------|----------------------|------------|
| pSFS2A CT-V5/His6                  |                      | [1]        |
| pSFS2A CT-V5/His6 Rbe1 FR1         | pSFS2A CT            | This study |
| pSFS2A CT-V5/His6 Rbe1 FR1 ORF FR2 | pSFS2A CT Rbe1 FR1   | This study |
| pSFS2A CT-V5/His6 Rbt4 FR1         | pSFS2A CT            | This study |
| pSFS2A CT-V5/His6 Rbt4 FR1 ORF FR2 | pSFS2A CT Rbe1 FR1   | This study |
| pET-19b(+) NT-His10 Rbe1 opt       | pET-19b(+)           | GenScript  |
| pET-19b(+) NT-His10 Rbt4 opt       | pET-19b(+)           | GenScript  |
| pRS416 Rbe1 ORF                    | pRS416               | This study |
| pRS416 Rbt4 ORF                    | pRS416               | This study |

1. Palzer S, Bantel Y, Kazenwadel F, Berg M, Rupp S, et al. (2013) An expanded genetic code in *Candida albicans* to study protein-protein interactions in vivo. *Eukaryot Cell* 12: 816-827.
