# Supplementary material
Source: publisher figshare collection journal article supplement (https://plos.figshare.com/articles/dataset/_/6937817)
Supplement: Supplementary file [file 1]

| Construct                                  | Primer Name              | Sequence 5' - 3'                                                     |
|--------------------------------------------|--------------------------|----------------------------------------------------------------------|
| <b>pSFS2A CT Rbe1 FR1 ORF FR2</b>          | RBE1 FR1 for Apal        | GCTC <u>GGGCCC</u> ATGCCACAAGTCTCCCATTC                              |
|                                            | RBE1 ORF wo TAA rev XhoI | CCG <u>CTCGAG</u> CTTTAAAGGTGGCAAGACGTT                              |
|                                            | RBE1 FR2 for NotI        | ATAAGAAT <u>GCGGCCGC</u> AAAAAAAAAAGAAAGATTAATT<br>TGATGATG          |
|                                            | RBE1 FR2 rev SacII       | TCC <u>CCGCGG</u> GTGAGTACCACCACCACCAA                               |
| <b>pSFS2A CT Rbt4 FR1 ORF FR2</b>          | RBT4 FR1 for Apal        | GCTC <u>GGGCCCC</u> AATTCACGCATTCCAAC TG                             |
|                                            | RBT4 ORF wo TAA rev XhoI | CCG <u>CTCGAG</u> TTGTGGTCTCAAGACATTTTCAG                            |
|                                            | RBT4 FR2 for NotI        | ATAAGAAT <u>GCGGCCGC</u> ATGATTTATTAGACCTAGTC<br>CTTGTCCA            |
|                                            | RBT4 FR2 rev SacI        | <u>CGAGCTC</u> AGATCAGGAAGCTCGGGAAT                                  |
| <b>pRS416 Rbe1 ORF w/o signal sequence</b> | Alpha factor Rbe1 for    | AGAAGGGGTATCTTTGGATAAAAGAGAGGCTGAAGC<br>CACTATCACCAAATTCTTTACT       |
|                                            | Alpha factor Rbe1 rev    | CAAAGGAAAAGGGGCCTGTCTCGAGGTCGACGGTA<br>TCGATTTACTTTAAAGGTGGCAAGACG   |
| <b>pRS416 Rbt4 ORF w/o signal sequence</b> | Alpha factor Rbt4 for    | AGAAGGGGTATCTTTGGATAAAAGAGAGGCTGAAGA<br>AATCGCCTATGTCACCCA           |
|                                            | Alpha factor Rbt4 rev    | CAAAGGAAAAGGGGCCTGTCTCGAGGTCGACGGTA<br>TCGATTTATTGTGGTCTCAAGACATTTTC |
