# Supplementary material
Source: publisher figshare collection journal article supplement (https://plos.figshare.com/articles/dataset/_/6937817)
Supplement: Supplementary file [file 1]

A

|                |                                                               |
|----------------|---------------------------------------------------------------|
| Rbe1 Optimized | ATGAAGATTACCAATACCCTGCTGAATGCGGCGGCGCTGCTGGCGGTTACCGAAGCGGCG  |
| Rbe1 Original  | ATGAAGATAACAAATACTTTACTTTAATGCTGCTGCATTATTAGCAGTCACAGAAGCTGCC |
| Rbe1 Optimized | ACCATCACCAGTTTTTCACGCGAGCACCCAGACCCTGTTCTGTGACCAGACCAGCCAA    |
| Rbe1 Original  | ACTATCACCAAATTCTTTACTGCCTCAACTCAAACCTCTTTTGTACCCAAACTAGTCAA   |
| Rbe1 Optimized | ACCGTGGTTGCGACCAGAGCTTTTGTTGAGACCATCTACAGCGCTCCGCCGAAGCAGCTG  |
| Rbe1 Original  | ACCGTTGTGGCCACCAAATCATTGTGTTGAAACAATTTATTCAGCTCCACCAAAACAACTC |
| Rbe1 Optimized | ACCAGCAAAACCCAAGACAGCACCAGCCCCGACCACCAGCAGCGTGAACAGCCTGACCAGC |
| Rbe1 Original  | ACTAGTAAAACTCAAGACTCTACCTCCCCAACTACTAGCTCCGTCAACTCATTAACCAGT  |
| Rbe1 Optimized | AGCAGCGCGACCAGCTATGTGGAGACCACCACCCGCGCCGAGCAGCAGCACCCCTGACC   |
| Rbe1 Original  | AGTTCGGCCACTTCATATGTCGAAACTACAACCTCCAGCTCCATCTTCGTCAACTTTGACA |
| Rbe1 Optimized | ACCAGCACCATCAGCAGCAGCACCGCGAGCGAAGACAGCGATGCGACCCCGACCGCGGAT  |
| Rbe1 Original  | ACTTCCACTATATCTTCATCTACTGCTAGTGAAGATTCAGACGCTACACCTACCGCCGAT  |
| Rbe1 Optimized | GTGGAGTTTGCGGAGGAAATTCTGAAGGAACACAACGTGAAACGTGCGCTGCATGGTGTT  |
| Rbe1 Original  | GTTGAATTTGCCGAGGAAATTTTGAAAGAACATAATGTCAAGAGAGCACTCCATGGTGTG  |
| Rbe1 Optimized | CCGGCGCTGAGCTGGAGCAACAAGCTGGCGGAGTACGCGCAGGACTATGCGAACACCGGC  |
| Rbe1 Original  | CCTGCACTTAGTTGGAGTAACAAATTAGCCGAATACGCTCAAGATTACGCTAACACTGGA  |
| Rbe1 Optimized | TTTGATTGCAGCAACCTGAACCTGAAACACAGCGGTGGCCCGTATGGTGAAAACCTGGCG  |
| Rbe1 Original  | TTCGATTGTAGCAATCTTAACTTGAAACATTCTGGTGGTCCATACGGTGAAAATTTGGCT  |
| Rbe1 Optimized | GCGGGTTATATGGGTGGCATCAGCCCGGTTGACGCGTGGTACGATGAGATTAGCATGGTG  |
| Rbe1 Original  | GCTGGTTATATGGGTGGAATTAGTCCTGTTGATGCTTGGTATGATGAAATCTCCATGGTT  |
| Rbe1 Optimized | GACTGGAACAACGTTGATTTACCGAAAGCACCGGTCACTTTACCCAGCTGGTGTTGGCGT  |
| Rbe1 Original  | GATTGGAACAATGTCGATTTCACTGAGTCTACCGGACACTTTACTCAACTTGATGGCGT   |
| Rbe1 Optimized | AGCACCACCAAGTTGGCTGCGCGAAAATGATGTGCAGCACCGCGTGGCGTCAAATCACC   |
| Rbe1 Original  | AGTACCACTCAAGTTGGTTGTGCTAAAATGATGTGTTCTACTGCCTGGAGACAAATCACT  |
| Rbe1 Optimized | GTGTGCGAATATCTGCCGCGTGGTAACGTTATTGGCCTGAATGTTACCAGCGGTATAGC   |
| Rbe1 Original  | GTTTGTGAATACTTGCCTCGTGGTAATGTCATTGGTTTGAATGTCACCTCAGGACACTCA  |
| Rbe1 Optimized | TACTTCGTGGACAAATGTTCTGCCGCCGCTGAAATAA                         |
| Rbe1 Original  | TACTTTGTTGACAACGTCTTGCCACCTTTAAAGTAA                          |

## B

|                                 |                                                                                                                                                                             |
|---------------------------------|-----------------------------------------------------------------------------------------------------------------------------------------------------------------------------|
| Rbt4 Optimized<br>Rbt4 Original | ATGAAGTTT <b>AGCCAG</b> GTT <b>GCGACCACCGCGGCG</b> ATTTTT <b>GCGGGCCTG</b> ACC <b>ACCGCGGAG</b><br>ATGAAGTTTTCTCAAGTTGCCACTACTGCTGCCATTTTTGCTGGTTTAACCACTGCTGAA             |
| Rbt4 Optimized<br>Rbt4 Original | <b>ATTGCGTACGT</b> GACCCAG <b>ACCCGTGGCGTGACC</b> GTTGGTGAA <b>ACCGCG</b> ACC <b>TGGCGACC</b><br>ATCGCCTATGTCACCCAGACTCGTGGTGTTACTGTTGGTGAAACTGCCACCGTTGCTACA               |
| Rbt4 Optimized<br>Rbt4 Original | <b>ACCGTG</b> ACCGTTGGT <b>GCGACCGTTACCGGTGGCGGT</b> CAGGTCAGATCAAG <b>TGCAGCAA</b><br>ACTGTTACCGTTGGTGCAACTGTCACAGGTGGTGGCCAAGGTCAAGATCAAGTTCAACAA                         |
| Rbt4 Optimized<br>Rbt4 Original | <b>AGCGCGGCGCCGGAGGCG</b> GATGATATC <b>CAGCAAAGCGCG</b> GTT <b>CCGGAA</b> <b>GCGGACGATATT</b><br>TCAGCTGCTCCAGAAGCTGATGATATCCAACAATCAGCTGTTCCAGAAGCTGATGATATC               |
| Rbt4 Optimized<br>Rbt4 Original | <b>CAGCAAAGCGTG</b> GTT <b>CCGGAAGCGGAGCCGACCGCG</b> GAT <b>GCGGATGGCGGT</b> <b>AACGGTATC</b><br>CAACAATCAGTTGTTCCAGAAGCTGAACCCACTGCCGATGCTGATGGTGGTAATGGTATT               |
| Rbt4 Optimized<br>Rbt4 Original | <b>GCGATTACCGAGGTGTT</b> CACCACC <b>ACCATCATGGGCCAA</b> <b>GAAATTGTG</b> TAT <b>AGCGGC</b> GTT<br>GCAATTACCGAAGTCTTTACCACTACCATTATGGGTCAAGAGATTGTTTATTCCGGTGTT              |
| Rbt4 Optimized<br>Rbt4 Original | <b>TACTATAGCTACGGCGAG</b> GAAC <b>CAC</b> ACCTAT <b>GGCGACGTG</b> CAAGTT <b>CAGACCCTGACCATC</b><br>TATTACAGTTATGGTGAAGAACATACCTATGGAGACGTTCAAGTTCAAACCTCACTATT              |
| Rbt4 Optimized<br>Rbt4 Original | <b>GGCGGTGGCGGT</b> TTTT <b>CCGAGCGACGATCAGTACCCGACCACCGAG</b> GTTTCT <b>GCGGAAGCG</b><br>GGGGGTGGCGGCTTCCTTCAGATGACCAATATCCTACAACCTGAAGTTTCTGCTGAGGCT                      |
| Rbt4 Optimized<br>Rbt4 Original | <b>AGCCCGAGCGCGGTGACCACCAGCAGCGCG</b> GTT <b>GCGACCCGGATGCGAAGGTGCCG</b> GAC<br>AGTCCATCTGCTGTTACTACTTCTTCTGCTGTTGCTACTCCTGACGCCAAAGTCCAGAC                                 |
| Rbt4 Optimized<br>Rbt4 Original | <b>AGCACC</b> AAA <b>GATGCGAGC</b> CAAC <b>CGGCGGCGACCACCGGAGCGGTAGCAGCAGCGGTAGC</b><br>TCTACTAAAGACGCTTCTCAACCGCTGCTACTACAGCTAGTGGCTCCTCTTCTGGTAGT                         |
| Rbt4 Optimized<br>Rbt4 Original | <b>AACGAC</b> TT <b>CAGCGGTGTTAAG</b> GATACCAAATTT <b>GCGCAGCAAATTCTGGACGCG</b> CACAAC<br>AATGACTTTAGTGGTGTTAAAGATACCAAATTTGCTCAACAAATTTGGATGCTCACAAC                       |
| Rbt4 Optimized<br>Rbt4 Original | <b>CAGAAGCGTGCGCGT</b> CATGGT <b>GTGCCGGACCTGACCT</b> TGGGAT <b>GCGACC</b> GTTTACCAATAT<br>CAAAAACGTGCTAGACATGGTGTTCAGATTTGACTTGGGATGCTACTGTTTACCAATAT                      |
| Rbt4 Optimized<br>Rbt4 Original | <b>GCGCAGAAGTTCGCG</b> GATCAATAC <b>AGCTGCAGC</b> GGTAAC <b>CTGCAGCACAGCGGC</b> GGTAAA<br>GCTCAAAAATTTGCTGATCAATACAGTTGTTCTGGTAACCTGCAACACTCTGGTGGTAAA                      |
| Rbt4 Optimized<br>Rbt4 Original | <b>TACGGC</b> GAAAAC <b>CTGGCG</b> GTT <b>GGC</b> TAT <b>GCG</b> GATGGT <b>GCGGCGGCGCTGCAGGCG</b> TGGTAC<br>TATGGTGAAAACCTGGCTGTTGGTTATGCTGATGGTGCTGCTCTTCAAGCTTGGTAC       |
| Rbt4 Optimized<br>Rbt4 Original | <b>GAGGAA</b> <b>GCGGGCAAGGATGGTCTG</b> AGCTAC <b>AGCTAT</b> GGT <b>AGCAGCAGCGTGTAT</b> <b>AACCA</b> C<br>GAAGAAGCTGGTAAGGACGGATTAAGCTACAGTTACGGTTCTTCTTCTGTATACAACCAT      |
| Rbt4 Optimized<br>Rbt4 Original | <b>TTTACC</b> CAA <b>GTGGTTTGG</b> <b>AAGAGC</b> ACCACCAA <b>CTGGGCTGCGCGTAC</b> <b>AAAGACTGCCGT</b><br>TTCACCTCAAGTTGTCTGGAAATCAACCACCAA <b>CTGGTTGTGCTTACAAGGATTGTCGT</b> |
| Rbt4 Optimized<br>Rbt4 Original | <b>GCGCAG</b> AACTGGGG <b>CTGTGTACGTG</b> GTT <b>TGCAGCTATGATCCGGCGGGC</b> AAC <b>GTGATGGC</b><br>GCTCAAACTGGGGATTATACGTTGTTGTTCTACGACCCAGCTGGTAACGTTATGGGT                 |
| Rbt4 Optimized<br>Rbt4 Original | <b>ACCGACCCG</b> AAG <b>ACCGGCAAGAGC</b> TATAT <b>GCGG</b> AAAAT <b>GTTCTGCGTCCG</b> CAATAA<br>ACTGATCCAAAGACTGGTAATCTTATATGGCTGAAAATGTCTTGAGACCACAATAA                     |
