# Supplementary material
Source: publisher figshare collection journal article supplement (https://plos.figshare.com/articles/dataset/_/6937817)
Supplement: Supplementary file [file 1]

| Strain                                 | Genotype                                                                                                  | Parental strain | Reference  |
|----------------------------------------|-----------------------------------------------------------------------------------------------------------|-----------------|------------|
| SC5314                                 | <i>Candida albicans</i> wild type (clinical isolate)                                                      |                 | [1]        |
| Rbe1-CT-V5/His6                        | <i>RBE1/rbe1Δ::FRT RBE1</i> V5 His6                                                                       | SC5314          | This study |
| Rbt4-CT-V5/His6                        | <i>RBT4/rbt4Δ::FRT RBT4</i> V5 His6                                                                       | SC5314          | This study |
| <i>rbe1Δ</i>                           | <i>rbe1Δ::FRT/rbe1Δ::FRT</i>                                                                              | SC5314          | [2]        |
| <i>rbe1Δrbt4Δ</i>                      | <i>rbt4Δ::FRT/rbt4Δ::FRT</i><br><i>rbe1Δ::FRT/rbe1Δ::FRT</i>                                              | SC5314          | [2]        |
| <i>say1Δhem1Δ</i>                      | <i>MATα his3Δ1 leu2Δ0 ura3Δ0 lys2Δ0</i><br><i>say1::KanMX4 hem1::LEU2</i>                                 |                 | [3]        |
| <i>pry1Δpry2</i><br><i>Δsay1Δhem1Δ</i> | <i>MATα his3Δ1 leu2Δ0 ura3Δ0 lys2Δ0</i><br><i>pry1::KanMX4 pry2::URA3 say1::HIS3</i><br><i>hem1::LEU2</i> |                 | [4]        |

1. Gillum AM, Tsay EY, Kirsch DR (1984) Isolation of the *Candida albicans* gene for orotidine-5'-phosphate decarboxylase by complementation of *S. cerevisiae* *ura3* and *E. coli* *pyrF* mutations. *Mol Gen Genet* 198: 179-182.
2. Rohm M, Lindemann E, Hiller E, Ermert D, Lemuth K, et al. (2013) A family of secreted pathogenesis-related proteins in *Candida albicans*. *Mol Microbiol* 87: 132-151.
3. Tiwari R, Köffel R, Schneiter R (2007) An acetylation/deacetylation cycle controls the export of sterols and steroids from *S. cerevisiae*. *The EMBO Journal* 26: 5109-5119.
4. Choudhary V, Schneiter R (2012) Pathogen-Related Yeast (PRY) proteins and members of the CAP superfamily are secreted sterol-binding proteins. *Proc Natl Acad Sci U S A* 109: 16882-16887.
