# Supplementary material
Source: publisher figshare collection journal article supplement (https://plos.figshare.com/articles/dataset/_/6937817)
Supplement: Supplementary file [file 1]

| Identified Proteins                                                                        | Accession Number (NCBI) | Monomer sample |         | Dimer sample |         |
|--------------------------------------------------------------------------------------------|-------------------------|----------------|---------|--------------|---------|
|                                                                                            |                         | Control        | Rbe1-V5 | Control      | Rbe1-V5 |
| hypothetical protein MGQ_01364 [Candida albicans P76067] Repressed by Efg1 ( <i>RBE1</i> ) | KHC42070.1              | 0              | 17      | 2            | 34      |
| likely HSP70 family chaperonin [Candida albicans SC5314]                                   | XP_713714.1             | 7              | 14      | 0            | 0       |
| chaperone DnaK [Candida albicans 19F]                                                      | KGU15991.1              | 9              | 11      | 0            | 0       |
| polyadenylate-binding protein, cytoplasmic and nuclear [Candida albicans P94015]           | KGQ95663.1              | 2              | 1       | 0            | 0       |
| translation elongation factor 3 [Candida albicans]                                         | CAA78282.1              | 0              | 0       | 6            | 7       |
| NADH-ubiquinone oxidoreductase 75 kDa subunit [Candida albicans WO-1]                      | EEQ44016.1              | 5              | 12      | 0            | 0       |
| hypothetical protein W5Q_01381 [Candida albicans SC5314]                                   | KHC84156.1              | 0              | 0       | 7            | 3       |
| leucyl-tRNA synthetase [Candida albicans WO-1]                                             | EEQ43286.1              | 0              | 0       | 2            | 1       |
| acetate--CoA ligase [Candida albicans SC5314]                                              | AOW26103.1              | 0              | 2       | 0            | 0       |
| coatomer protein complex, subunit alpha (xenin) [Candida albicans P37005]                  | KGQ92106.1              | 0              | 0       | 2            | 1       |
| transketolase [Candida albicans WO-1]                                                      | EEQ42384.1              | 1              | 4       | 0            | 0       |
| pyruvate carboxylase [Candida albicans P94015]                                             | KGQ86632.1              | 0              | 0       | 1            | 0       |
| chaperone protein CaMsi3p [Candida albicans]                                               | BAB71816.1              | 2              | 0       | 0            | 0       |
| hypothetical protein MEU_02536 [Candida albicans P37005]                                   | KGQ92022.1              | 0              | 0       | 3            | 1       |
| plasma membrane ATPase [Candida albicans WO-1]                                             | EEQ44146.1              | 0              | 0       | 2            | 2       |
| hypothetical protein MG1_02805 [Candida albicans GC75]                                     | KGQ98165.1              | 0              | 0       | 5            | 4       |

|                                                                           |            |   |   |   |   |
|---------------------------------------------------------------------------|------------|---|---|---|---|
| protein EPD1 precursor [Candida albicans WO-1]                            | EEQ43106.1 | 0 | 0 | 4 | 3 |
| ubiquitin-activating enzyme E1 [Candida albicans P94015]                  | KGQ86919.1 | 0 | 0 | 2 | 3 |
| hypothetical protein MEO_00975 [Candida albicans P94015]                  | KGQ90660.1 | 2 | 3 | 0 | 0 |
| hypoxia up-regulated 1 [Candida albicans P94015]                          | KGQ88838.1 | 0 | 0 | 2 | 2 |
| hypothetical protein CAWG_03911 [Candida albicans WO-1]                   | EEQ45582.1 | 0 | 0 | 2 | 2 |
| hypothetical protein MEU_00181 [Candida albicans P37005]                  | KGQ98590.1 | 1 | 3 | 0 | 0 |
| hypothetical protein MG3_02408 [Candida albicans P78048]                  | KGR13974.1 | 0 | 0 | 2 | 2 |
| conserved hypothetical protein [Candida albicans WO-1]                    | EEQ45027.1 | 0 | 0 | 0 | 1 |
| hypothetical protein MEO_03840 [Candida albicans P94015]                  | KGQ85522.1 | 0 | 0 | 2 | 0 |
| hypothetical protein CAALFM_C200360CA [Candida albicans SC5314]           | AOW27090.1 | 2 | 0 | 0 | 0 |
| cytoskeleton assembly control protein Sla2p [Candida albicans]            | CAA08750.1 | 0 | 0 | 1 | 1 |
| flavocytochrome c [Candida albicans P37005]                               | KGQ97513.1 | 1 | 2 | 0 | 0 |
| valyl-tRNA synthetase, mitochondrial precursor [Candida albicans WO-1]    | EEQ46054.1 | 0 | 0 | 1 | 1 |
| glycerol-3-phosphate dehydrogenase, mitochondrial [Candida albicans GC75] | KGQ92654.1 | 2 | 0 | 0 | 0 |
| ATP-dependent RNA helicase DED1 [Candida albicans P94015]                 | KGQ88221.1 | 1 | 0 | 0 | 0 |
| drug resistance protein 2 [Candida albicans]                              | AAB96797.1 | 0 | 0 | 0 | 1 |
| hypothetical protein CAWG_05603 [Candida albicans WO-1]                   | EEQ47048.1 | 1 | 0 | 0 | 0 |
| conserved hypothetical protein [Candida albicans WO-1]                    | EEQ46430.1 | 0 | 0 | 0 | 2 |
| conserved hypothetical protein [Candida albicans WO-1]                    | EEQ42790.1 | 1 | 0 | 0 | 0 |

|                                                                             |            |   |   |   |   |
|-----------------------------------------------------------------------------|------------|---|---|---|---|
| heat shock protein SSC1, mitochondrial precursor<br>[Candida albicans WO-1] | EEQ47268.1 | 2 | 0 | 0 | 0 |
| vacuolar ATP synthase subunit a [Candida albicans<br>WO-1]                  | EEQ44988.1 | 0 | 1 | 0 | 0 |
